# Supplementary material
Source: MDPI journal article supplement (https://www.mdpi.com/2076-3263/11/4/172)
Supplement: s1 [file s1]

## Sheet: Table S1
Table S1. Type, age, and location of analyzed samples
Sample ID	Formation	Age	Outcrop Location	Physiographic Province	Latitude	Longitude
CD 1	Cotter Dolomite	Lower Ordovician	near Rogers, AR	Ozark Region	36°31'50.39" N	94°17'48.36" W
CD 2	Cotter Dolomite	Lower Ordovician	near Rogers, AR	Ozark Region	36°31'50.39" N	94°17'48.36" W
CD 4	Cotter Dolomite	Lower Ordovician	near Rogers, AR	Ozark Region	36°31'50.39" N	94°17'48.36" W
CD 6	Cotter Dolomite	Lower Ordovician	near Rogers, AR	Ozark Region	36°30'53.52" N	94°17'11.67" W
CD 8	Cotter Dolomite	Lower Ordovician	near Green Forest, AR	Ozark Region	36°25'11.37" N	93°50'51.93" W
PT 2	Boone Formation	Mississippian	Pineville, MO	Ozark Region	36°34'2.84" N	94°21'35.43" W
PT 6	Boone Formation	Mississippian	Pineville, MO	Ozark Region	36°33'56.99" N	94°21'17.46" W
PT S2	Boone Formation	Mississippian	Pineville, MO	Ozark Region	36°33'57.6"N	94°22'15.59"W
LT 1	Boone Formation	Mississippian	Lanagan, MO	Ozark Region	36°36'14.86" N	94°24'29.61" W
LT 2	Boone Formation	Mississippian	Lanagan, MO	Ozark Region	36°36'16.15" N	94°24'30.15" W
LT S1	Boone Formation	Mississippian	Lanagan, MO	Ozark Region	36°37'55.19"N	94°25'4.8"W
LT S2	Boone Formation	Mississippian	Lanagan, MO	Ozark Region	36°37'55.19"N	94°25'4.8"W
LT S3	Boone Formation	Mississippian	Lanagan, MO	Ozark Region	36°37'55.19"N	94°25'4.8"W
LT S4	Boone Formation	Mississippian	Lanagan, MO	Ozark Region	36°37'55.19"N	94°25'4.8"W
BV S1	Boone Formation	Mississippian	Bella Vista, AR	Ozark Region	36°24'43.19"N	94°12'46.79"W
BV S2	Boone Formation	Mississippian	Bella Vista, AR	Ozark Region	36°24'43.19"N	94°12'46.79"W
BV S3	Boone Formation	Mississippian	Bella Vista, AR	Ozark Region	36°24'43.19"N	94°12'46.79"W
BV S4	Boone Formation	Mississippian	Bella Vista, AR	Ozark Region	36°24'43.19"N	94°12'46.79"W
BF 1	Bigfork Chert	Middle-Upper Ordovician	Malvern Minerals Company "Ten Mile Pit"	Ouachita Mountains	34°33'6.43" N	92°50'56.78" W
BF 2	Bigfork Chert	Middle-Upper Ordovician	Malvern Minerals Company "Ten Mile Pit"	Ouachita Mountains	34°33'8.70" N	92°50'58.52" W
BF 3	Bigfork Chert	Middle-Upper Ordovician	Fox Pass Cutoff Quarry, N Hot Springs	Ouachita Mountains	34°34'39.71" N	93°0'1.25" W
BF 5	Bigfork Chert	Middle-Upper Ordovician	Hwy 7, E Hot Springs	Ouachita Mountains	34°37'0.67" N	93°2'21.48" W
BF 7	Bigfork Chert	Middle-Upper Ordovician	Colonel Glenn Rd, W I-430	Ouachita Mountains	34°42'54.46" N	92°24'3.33" W
HT 4	Hatton Tuff	Mississippian	Hatton, AR	Ouachita Mountains	34°21'3.22" N	94°22'16.60" W
HT 5	Hatton Tuff	Mississippian	Hatton, AR	Ouachita Mountains	34°21'3.22" N	94°22'16.60" W

## Sheet: Table S2
Table S2. Rare Earth Elements, Pb, Th, and U concentrations in analyzed samples (in ppm).
Sample ID	La	Ce	Pr	Nd	Sm	Eu	Gd	Tb	Dy	Ho	Er	Tm	Yb	Lu	Pb	Th	U	Eu/Eu*NASC	Ce/Ce*NASC	(La/Yb)NASC	(La/Sm)NASC
CD 1	0.0642158	0.113369	0.0121922	0.0502802	0.00797321	0.0012648	0.00479236	0.000782423	0.00478227	0.00100021	0.00301973	0.00047086	0.0030469	0.000531265	0.154837	0.018715	1.0584	0.898785	0.936199	2.10758	1.45491
CD 2	0.203474	0.0190072	0.0341281	0.161134	0.0203578	0.00254356	0.00897586	0.000933162	0.00420535	0.000752291	0.00188177	0.000185925	0.000994886	0.00019723	0.101885	9.90934e-05	0.219089	0.790693	0.0521313	20.452	1.80552
CD 4	0.102114	0.174263	0.0183545	0.0825408	0.0144867	0.00259971	0.00840146	0.00133163	0.00848646	0.00173114	0.0052728	0.000804441	0.00528929	0.000938695	0.26263	0.0477095	1.19467	1.031	0.926037	1.93057	1.27333
CD 6	0.168816	0.281193	0.0334589	0.160079	0.0243872	0.00618894	0.0137669	0.00193156	0.0113012	0.00223638	0.00634629	0.000903107	0.00564328	0.000988891	0.169768	0.0553189	0.948129	1.47306	0.867041	2.99145	1.25048
CD 8	0.115666	0.201905	0.0230368	0.105065	0.0174142	0.00262937	0.00959264	0.00142181	0.00900488	0.00186334	0.0057269	0.000862953	0.00575263	0.00103265	0.13892	0.0551697	0.842141	0.88452	0.906699	2.01067	1.19986
PT 2	0.398922	0.385828	0.0963086	0.554796	0.113427	0.0186006	0.0853004	0.0127565	0.0769153	0.0159732	0.0427058	0.00527468	0.0296237	0.00497756	0.43649	0.0661728	0.0951999	0.845668	0.459598	1.34663	0.635329
PT 6	2.57572	1.98899	0.429634	2.42611	0.477904	0.0798617	0.3643	0.0550689	0.345473	0.0712146	0.188578	0.022738	0.123703	0.0206765	0.684069	0.0712692	0.144194	0.85653	0.431891	2.08217	0.973607
PT S2	1.60397	1.37825	0.338459	1.47653	0.294432	0.0666146	0.346918	0.053915	0.303987	0.0649389	0.179936	0.0200924	0.122472	0.0163857	0.884633	0.0552063	0.226551	0.930694	0.434978	1.30967	0.984099
LT 1	1.20564	0.918541	0.308543	2.25978	0.585261	0.117976	0.644038	0.0868164	0.473339	0.0838723	0.193372	0.0206148	0.104555	0.0165566	0.10768	0.0316726	0.113282	0.861022	0.351764	1.15312	0.372129
LT 1D	1.24755	0.961711	0.320203	2.30511	0.59688	0.122082	0.663666	0.0877262	0.48575	0.0862504	0.199401	0.0216355	0.1061	0.017235	0.111341	0.0315301	0.116249	0.868736	0.355401	1.17583	0.377572
LT 2	3.22125	1.69193	0.470189	2.60572	0.501544	0.0820133	0.388134	0.0579192	0.364115	0.0756944	0.198904	0.0232614	0.12194	0.019977	0.0839916	0.0283349	0.17774	0.83244	0.309037	2.64167	1.16022
LT S1	2.6084	2.37362	0.60353	2.56853	0.519567	0.113571	0.593433	0.0942278	0.546183	0.115991	0.332532	0.0385115	0.225515	0.0317122	1.85955	0.09047	0.291472	0.914859	0.441355	1.15664	0.906899
LT S2	0.622116	0.684562	0.131888	0.536502	0.0953056	0.0208894	0.105217	0.0147824	0.0862029	0.0175657	0.0524364	0.0059257	0.0396057	0.00527579	1.41393	0.0658644	0.340649	0.934577	0.55585	1.57077	1.17918
LT S3	1.52255	1.82421	0.355089	1.5233	0.313199	0.0692477	0.363026	0.0575594	0.329306	0.0698424	0.199369	0.0238366	0.143661	0.0197946	0.604934	0.243757	0.212998	0.917862	0.578914	1.05982	0.878167
LT S4	3.73684	6.20477	0.910656	3.86317	0.722423	0.149406	0.803408	0.117691	0.618263	0.128516	0.363684	0.0413423	0.24834	0.0347337	4.82202	0.180155	0.16088	0.878324	0.785429	1.50473	0.934414
BV S1	1.3628	1.08187	0.314151	1.35551	0.282427	0.0630048	0.343356	0.0581643	0.366714	0.0958604	0.294171	0.0335697	0.188562	0.0256107	0.126168	0.0472847	0.188076	0.924904	0.387844	0.726304	0.860982
BV S2	2.05546	1.87748	0.5189	2.58939	0.583338	0.134657	0.695146	0.111139	0.574451	0.112917	0.294065	0.0323119	0.183662	0.0242346	0.522362	0.129173	0.172166	0.943572	0.424613	1.11915	0.636526
BV S3	1.77464	1.64088	0.416442	1.82778	0.382289	0.0784068	0.438021	0.0699652	0.393438	0.0815938	0.225691	0.0261529	0.154088	0.0211687	0.740842	0.148434	0.166572	0.856901	0.445445	1.1517	0.838581
BV S4	2.84947	2.77605	0.690194	3.00592	0.609852	0.131408	0.714096	0.114509	0.649283	0.134213	0.376474	0.0425201	0.248084	0.0342388	0.979606	0.143728	0.396982	0.889473	0.46221	1.14859	0.844046
BF 1	0.282035	0.422342	0.0567266	0.3127	0.0649793	0.0115004	0.0521013	0.00891754	0.0643783	0.0168642	0.0648593	0.0103938	0.0711437	0.0123585	0.0792662	0.0781585	0.0872134	0.88644	0.774471	0.39643	0.784069
BF 2	9.16617	18.6049	3.32722	24.0117	4.00895	0.59795	1.98977	0.213371	1.09508	0.208684	0.534298	0.0470171	0.190647	0.0226173	2.74036	0.293337	1.36331	0.907196	0.774738	4.80794	0.413032
BF 3	7.51954	13.1787	2.0697	11.2939	1.88697	0.270609	1.52317	0.222076	1.29194	0.231654	0.554124	0.0646247	0.358354	0.0523276	1.59657	0.687472	0.92084	0.716039	0.779686	2.09836	0.719869
BF 5	3.94312	7.15016	0.718866	3.60507	0.673809	0.0904155	0.415459	0.0598689	0.373646	0.0800373	0.239858	0.0344746	0.217947	0.0375187	0.895804	1.28313	0.567987	0.752639	0.978204	1.80921	1.05713
BF 7	2.0146	3.50097	0.321939	1.3845	0.16177	0.0221831	0.0881963	0.0130115	0.0912195	0.0226223	0.0800492	0.0138819	0.104237	0.0208534	1.17941	0.599218	0.8546	0.806396	0.988346	1.93272	2.24967
HT 4	0.881477	4.26917	0.468182	2.61029	0.69106	0.052735	0.370664	0.0695271	0.477183	0.101782	0.32212	0.051703	0.367628	0.0739668	10.9642	0.779464	1.99014	0.451455	1.45314	0.239774	0.230421
HT 5	0.537071	2.64628	0.352053	2.09777	0.589278	0.0492645	0.335797	0.0709965	0.518824	0.113497	0.357692	0.0561476	0.391056	0.0775379	5.09293	0.589923	2.34153	0.483541	1.27638	0.137338	0.164641

## Sheet: Table S3
Table S3: Measaured (m) and age-corrected (c) lead isotope ratios of analyzed samples.
Sample ID	206 Pb / 204 Pbm	Error	206 Pb / 204 Pbc	207 Pb / 204 Pbm	Error	207 Pb / 204 Pbc	208 Pb / 204 Pbm	Error	208 Pb / 204 Pbc
CD 1	47.5533	0.00411	22.9188	16.9672	0.000645	15.7058	40.1083	0.00156	39.9666
CD 2	29.5382	0.000961	23.1862	16.3447	0.000649	16.0195	39.6197	0.00178	39.6187
CD 4	35.8411	0.000758	21.3401	16.4212	0.000344	15.6787	40.1207	0.00103	39.9324
CD 6	40.419	0.00101	21.5843	16.8325	0.00032	15.8681	40.5611	0.000959	40.2037
CD 8	43.4116	0.00139	22.3491	16.9436	0.000625	15.8651	40.4606	0.0016	40.0119
PT 2	21.4338	0.000378	20.8501	15.8335	0.000319	15.8036	40.0626	0.000956	39.9307
PT 6	21.4934	0.000372	20.9273	15.8757	0.00034	15.8467	40.2335	0.00106	40.1425
PT S2	22.1184	0.00432	21.4234	15.912	0.00357	15.8764	40.4053	0.00891	40.3502
LT 1	24.1894	0.000696	21.2618	15.9848	0.00046	15.8349	40.2864	0.00128	40.0202
LT 1D	24.1532	0.000693	21.2523	15.9634	0.000421	15.8149	40.2169	0.00201	39.961
LT 2	26.9991	0.00136	20.9321	16.1261	0.00074	15.8154	39.8259	0.00187	39.5114
LT S1	21.8092	0.00217	21.3862	15.8708	0.00151	15.8492	40.3089	0.00395	40.2662
LT S2	22.3161	0.00169	21.6615	15.8909	0.00123	15.8573	40.3103	0.00328	40.2691
LT S3	23.0072	0.00344	22.047	15.891	0.00238	15.8419	39.9343	0.00587	39.5769
LT S4	21.8972	0.00133	21.8067	15.8922	0.000914	15.8876	40.6435	0.0025	40.6106
BV S1	25.3289	0.0207	21.1381	15.9668	0.0115	15.7523	40.009	0.031	39.6664
BV S2	22.565	0.0106	21.6644	15.932	0.00723	15.886	40.4921	0.0178	40.2724
BV S3	22.2161	0.00452	21.6042	15.9103	0.00331	15.8789	40.5203	0.0084	40.343
BV S4	22.0913	0.00421	20.9938	15.8747	0.00303	15.8185	40.3026	0.00788	40.1734
BF 1	22.0801	0.00308	19.1474	15.8084	0.000772	15.6583	39.1288	0.00164	38.274
BF 2	20.1732	0.000237	18.8879	15.7347	0.000192	15.6689	38.7066	0.000522	38.6167
BF 3	21.2293	0.000377	19.7141	15.782	0.000347	15.7044	38.8771	0.00101	38.5092
BF 5	20.5413	0.000327	18.8733	15.7449	0.000272	15.6595	39.7009	0.000818	38.4755
BF 7	22.1445	0.000491	20.221	15.844	0.000356	15.7455	38.7138	0.00108	38.2752
HT 4	19.0494	0.000287	18.585	15.6654	0.000254	15.6416	39.1607	0.00064	39.1016
HT 5	19.5509	0.00041	18.3525	15.7064	0.00044	15.6451	40.0235	0.00151	39.9253
